# Supplementary material
Source: MDPI journal article supplement (https://www.mdpi.com/search?q=molbank-2023-M1554)
Supplement: s002 [file molbank-2023-M1554-s002.mol]

KingDraw KingDraw.mol
KingDraw2D

 19 21  0  0  0  0  0  0  0  0999 V2000
   24.6575   -9.4643    0.0000 C   0  0  0  0  0  0  0  0  0  0  0  0
   25.0994   -9.7161    0.0000 C   0  0  0  0  0  0  0  0  0  0  0  0
   25.5388   -9.4595    0.0000 C   0  0  0  0  0  0  0  0  0  0  0  0
   25.5359   -8.9500    0.0000 C   0  0  0  0  0  0  0  0  0  0  0  0
   25.0940   -8.6982    0.0000 C   0  0  0  0  0  0  0  0  0  0  0  0
   24.6542   -8.9556    0.0000 C   0  0  0  0  0  0  0  0  0  0  0  0
   25.0902   -8.1902    0.0000 C   0  0  0  0  0  0  0  0  0  0  0  0
   25.5289   -7.9312    0.0000 C   0  0  0  0  0  0  0  0  0  0  0  0
   25.5271   -7.4233    0.0000 C   0  0  0  0  0  0  0  0  0  0  0  0
   25.0844   -7.1711    0.0000 C   0  0  0  0  0  0  0  0  0  0  0  0
   24.6466   -7.4286    0.0000 C   0  0  0  0  0  0  0  0  0  0  0  0
   24.6475   -7.9380    0.0000 C   0  0  0  0  0  0  0  0  0  0  0  0
   25.9878   -7.9799    0.0000 C   0  0  0  0  0  0  0  0  0  0  0  0
   26.2049   -8.4359    0.0000 N   0  0  0  0  0  0  0  0  0  0  0  0
   25.9879   -8.8953    0.0000 C   0  0  0  0  0  0  0  0  0  0  0  0
   25.9920   -9.3196    0.0000 C   0  0  0  0  0  0  0  0  0  0  0  0
   26.3574   -9.1039    0.0000 C   0  0  0  0  0  0  0  0  0  0  0  0
   25.9838   -7.5555    0.0000 C   0  0  0  0  0  0  0  0  0  0  0  0
   26.3533   -7.7642    0.0000 C   0  0  0  0  0  0  0  0  0  0  0  0
  1  2  2  0
  2  3  1  0
  3  4  2  0
  4  5  1  0
  5  6  2  0
  1  6  1  0
  5  7  1  0
  7  8  2  0
  8  9  1  0
  9 10  2  0
 10 11  1  0
 11 12  2  0
  7 12  1  0
 13  8  1  0
 14 13  1  0
 15 14  1  0
  4 15  1  0
 15 16  1  0
 15 17  1  0
 13 18  1  0
 13 19  1  0
M  END
